# Supplementary material for: Quantifying the risks versus benefits of the Pfizer COVID-19 vaccine in Australia: a Bayesian network analysis
Source: bioRxiv or medRxiv preprint supplement (doi:10.1101/2022.02.07.22270637), 2022-02-08
Supplement: Supplementary file [file media-1.pdf]

## Supplementary Materials

**Table S1. Pfizer COVID-19 vaccine effectiveness against symptomatic infection with SARS-CoV-2 delta variant, by age group.**

| Age (years) | 1 dose <sup>a</sup> | 2 doses<br>(last dose 0 to <2<br>months ago) <sup>b</sup> | 2 doses<br>(last dose 2 to <4<br>months ago) <sup>b</sup> | 2 doses<br>(last dose 4 to <6<br>months ago) <sup>b</sup> | 3 doses<br>(<4 months<br>post 3 <sup>rd</sup> dose) <sup>c</sup> |
|-------------|---------------------|-----------------------------------------------------------|-----------------------------------------------------------|-----------------------------------------------------------|------------------------------------------------------------------|
| 12-19       | 53.1%               | 89.0%                                                     | 79.5%                                                     | 74.0%                                                     | 96.5%                                                            |
| 20-29       | 53.1%               | 86.5%                                                     | 73.0%                                                     | 48.0%                                                     | 96.5%                                                            |
| 30-39       | 53.1%               | 86.5%                                                     | 73.0%                                                     | 48.0%                                                     | 96.5%                                                            |
| 40-49       | 53.1%               | 86.3%                                                     | 72.8%                                                     | 51.8%                                                     | 96.5%                                                            |
| 50-59       | 53.1%               | 86.0%                                                     | 72.5%                                                     | 55.5%                                                     | 95.1%                                                            |
| 60-69       | 46.8%               | 82.8%                                                     | 69.0%                                                     | 50.8%                                                     | 93.1%                                                            |
| ≥70         | 46.8%               | 79.5%                                                     | 65.5%                                                     | 46.0%                                                     | 93.1%                                                            |

Sources:

<sup>a</sup>Chodick, G., Tene, L., Patalon, T., Gazit, S., Tov, A.B., Cohen, D., and Muhsen, K. (2021). Assessment of effectiveness of 1 dose of BNT162b2 vaccine for SARS-CoV-2 infection 13 to 24 days after immunization. *JAMA Network Open* 4(6):e2115985. <https://doi.org/10.1001/jamanetworkopen.2021.15985>. [1]

<sup>b</sup>Tartof, S.Y., Slezak, J.M., Fischer, H., Hong, V., Ackerson, B.K., Ranasinghe, O.N., et al. (2021). Effectiveness of mRNA BNT162b2 COVID-19 vaccine up to 6 months in a large integrated health system in the USA: a retrospective cohort study. *The Lancet* 398(10309):1407–1416. [https://doi.org/10.1016/S0140-6736\(21\)002183-8](https://doi.org/10.1016/S0140-6736(21)002183-8). [2]

<sup>c</sup>Perez, J.L. (2021). Efficacy and safety of BNT162b2 booster – C4591031 2 month interim analysis. *Centers for Disease Control and Prevention*. Accessed 17 December 2021 from <https://www.cdc.gov/vaccines/acip/meetings/downloads/slides-2021-11-19/02-COVID-Perez-508.pdf>. [3]

**Table S2. Pfizer COVID-19 vaccine effectiveness against death if infected with SARS-CoV-2 delta variant, by age group.**

| Age (years) | 1 dose <sup>a</sup> | 2 doses<br>(last dose 0 to <2<br>months ago) <sup>b</sup> | 2 doses<br>(last dose 2 to <4<br>months ago) <sup>b</sup> | 2 doses<br>(last dose 4 to <6<br>months ago) <sup>b</sup> | 3 doses<br>(<2 months<br>post 3 <sup>rd</sup> dose) <sup>b</sup> |
|-------------|---------------------|-----------------------------------------------------------|-----------------------------------------------------------|-----------------------------------------------------------|------------------------------------------------------------------|
| 12-59       | 89%                 | 98.2%                                                     | 95.3%                                                     | 91.7%                                                     | 98.2%                                                            |
| 60-69       | 74%                 | 97.6%                                                     | 95.2%                                                     | 92.0%                                                     | 97.6%                                                            |
| ≥70         | 74%                 | 97.0%                                                     | 95.2%                                                     | 92.2%                                                     | 97.0%                                                            |

Sources:

<sup>a</sup>Nasreen, S., Chung, H., He, S., Brown, K.A., Gubbay, J.B., Buchan, S.A., et al. (2021). Effectiveness of mRNA and ChAdOx1 COVID-19 vaccines against symptomatic SARS-CoV-2 infection and severe outcomes with variants of concern in Ontario. *medRxiv*. <https://doi.org/10.1101/2021.06.28.21259420>. [4]

<sup>b</sup>Andrews, N., Tessier, E., Stowe, J., Gower, C., Kirsebom, F., Simmons, R., et al. (2021). *medRxiv*. <https://doi.org/10.1101/2021.09.15.21263583>. [5]

**Table S3. Relative probability of infection by age group and sex for SARS-CoV-2 delta variant (chance of infection in each age-sex group if overall probability of infection of 1%).**

| Age (years)    | Male         | Female       |
|----------------|--------------|--------------|
| 0-11           | 1.37%        | 1.30%        |
| 12-19          | 1.41%        | 1.34%        |
| 20-29          | 1.41%        | 1.29%        |
| 30-39          | 1.18%        | 1.12%        |
| 40-49          | 0.98%        | 0.94%        |
| 50-59          | 0.76%        | 0.72%        |
| 60-69          | 0.51%        | 0.49%        |
| ≥70            | 0.39%        | 0.42%        |
| <b>Overall</b> | <b>1.03%</b> | <b>0.97%</b> |

Sources:

Australian Government Department of Health. (2021). Coronavirus (COVID-19) case numbers and statistics – cases and deaths by age and sex. *Australian Government Department of Health*. Accessed 17 December 2021 from <https://www.health.gov.au/news/health-alerts/novel-coronavirus-2019-ncov-health-alert/coronavirus-covid-19-case-numbers-and-statistics#novel-coronavirus-2019-ncov-weekly-epidemiology-reports-australia-2020-2021>. [6]

Australian Government Department of Health. (2021). Coronavirus disease 2019 (COVID-19) epidemiology reports, Australia, 2020-2021. *Australian Government Department of Health*. Accessed 17 December 2021 from <https://www1.health.gov.au/internet/main/publishing.nsf/Content/novel-coronavirus-2019-ncov-weekly-epidemiology-reports-australia-2020-2021>. [7]

**Table S4. Probability of infection (over 2 months) based on different intensities of community transmission.**

| Intensity of community transmission   | Cases per 100,000 over 16 weeks* | Cases per million over 2 months | Estimated % of population infected over 2 months | Equivalent to cases/day in Australia <sup>a</sup> |
|---------------------------------------|----------------------------------|---------------------------------|--------------------------------------------------|---------------------------------------------------|
| Zero                                  | 0                                | 0                               | 0.000%                                           | 0                                                 |
| Low*                                  | 29                               | 157                             | 0.016%                                           | 58                                                |
| Medium*                               | 275                              | 1,490                           | 0.149%                                           | 543                                               |
| High*                                 | 3,544                            | 19,197                          | 1.920%                                           | 6998                                              |
| 1% chance of infection over 2 months  |                                  | 10,000                          | 1.000%                                           | 3645                                              |
| 2% chance of infection over 2 months  |                                  | 20,000                          | 2.000%                                           | 7290                                              |
| 5% chance of infection over 2 months  |                                  | 50,000                          | 5.000%                                           | 18,225                                            |
| 10% chance of infection over 2 months |                                  | 10,0000                         | 10.000%                                          | 36,450                                            |

\* Definitions of low, medium, and high transmission (cases per 100,000 over 16 weeks) as defined by [9]. Low: similar to first wave in Australia. Medium: similar to second wave in VIC. High: similar to Europe in January 2021.

<sup>a</sup>Based on Australian population of 21.87 million. [8]

Source:

Australian Technical Advisory Group on Immunisation. (2021). Weighing up the potential benefits and risk of harm from COVID-19 vaccine AstraZeneca. *Australian Government Department of Health*. Accessed 17 December 2021 from

[https://www.health.gov.au/sites/default/files/documents/2021/06/covid-19-vaccination-weighing-up-the-potential-benefits-against-risk-of-harm-from-covid-19-vaccine-astrazeneca\\_2.pdf](https://www.health.gov.au/sites/default/files/documents/2021/06/covid-19-vaccination-weighing-up-the-potential-benefits-against-risk-of-harm-from-covid-19-vaccine-astrazeneca_2.pdf). [9]

**Table S5. Cases, deaths, and case fatality rate of COVID-19 in Australia in ages ≥12 years by age and sex, 1/1/2020 to 18/11/2021.**

| Age (years)  | Male          |              |                    | Female        |            |                    |
|--------------|---------------|--------------|--------------------|---------------|------------|--------------------|
|              | Cases         | Deaths       | Case fatality rate | Cases         | Deaths     | Case fatality rate |
| 12-19        | 11,934        | 1            | 0.01%              | 11,286        | 1          | 0.01%              |
| 20-29        | 20,066        | 6            | 0.03%              | 18,755        | 3          | 0.02%              |
| 30-39        | 17,324        | 12           | 0.07%              | 16,104        | 7          | 0.04%              |
| 40-49        | 12,277        | 28           | 0.23%              | 11,452        | 12         | 0.10%              |
| 50-59        | 9252          | 70           | 0.76%              | 8837          | 39         | 0.44%              |
| 60-69        | 5598          | 144          | 2.57%              | 5375          | 58         | 1.08%              |
| ≥70          | 5059          | 789          | 15.60%             | 5786          | 752        | 13.00%             |
| <b>Total</b> | <b>81,510</b> | <b>1,050</b> | <b>1.29%</b>       | <b>77,595</b> | <b>872</b> | <b>1.12%</b>       |

Sources:

Australian Government Department of Health. (2021). Coronavirus (COVID-19) case numbers and statistics – cases and deaths by age and sex. *Australian Government Department of Health*. Accessed 17 December 2021 from <https://www.health.gov.au/news/health-alerts/novel-coronavirus-2019-ncov-health-alert/coronavirus-covid-19-case-numbers-and-statistics#novel-coronavirus-2019-ncov-summary-statistics>. [6]

Australian Bureau of Statistics. (2021). National, state and territory population. *Australian Bureau of Statistics*. Accessed 15 December 2021 from [https://www.abs.gov.au/statistics/people/population/national-state-and-territory-population/mar-2021/31010do002\\_202103.xls](https://www.abs.gov.au/statistics/people/population/national-state-and-territory-population/mar-2021/31010do002_202103.xls). [8]

**Table S6. Estimated background incidence and fatality of myocarditis over 2 months (in populations who have not received the Pfizer COVID-19 vaccine and have not been diagnosed with COVID-19).**

| Age (years) <sup>a</sup> | Incidence of myocarditis over 2 months (per million population) <sup>b</sup> |        | Incidence of fatal myocarditis over 2 months (per million population) <sup>c</sup> |        | Case fatality rates from myocarditis |        |
|--------------------------|------------------------------------------------------------------------------|--------|------------------------------------------------------------------------------------|--------|--------------------------------------|--------|
|                          | Male                                                                         | Female | Male                                                                               | Female | Male                                 | Female |
| 12-19                    | 19.0                                                                         | 10.0   | 0.3                                                                                | 0.3    | 1.3%                                 | 2.5%   |
| 20-29                    | 40.1                                                                         | 17.3   | 0.5                                                                                | 0.3    | 1.2%                                 | 1.7%   |
| 30-39                    | 40.1                                                                         | 20.6   | 0.9                                                                                | 0.4    | 2.3%                                 | 2.2%   |
| 40-49                    | 40.1                                                                         | 23.8   | 1.3                                                                                | 0.7    | 3.3%                                 | 3.0%   |
| 50-59                    | 44.4                                                                         | 28.7   | 1.1                                                                                | 0.9    | 2.6%                                 | 3.1%   |
| 60-69                    | 50.9                                                                         | 35.8   | 1.3                                                                                | 1.0    | 2.5%                                 | 2.9%   |
| ≥70                      | 53.9                                                                         | 39.6   | 1.6                                                                                | 1.7    | 3.0%                                 | 4.3%   |

Sources:

<sup>a</sup>Australian Bureau of Statistics. (2021). National, state and territory population. *Australian Bureau of Statistics*. Accessed 15 December 2021 from [https://www.abs.gov.au/statistics/people/population/national-state-and-territory-population/mar-2021/31010do002\\_202103.xls](https://www.abs.gov.au/statistics/people/population/national-state-and-territory-population/mar-2021/31010do002_202103.xls). [8]

<sup>b</sup>Li, X., Ostropolets, A., Makadia, R., Shoaibi, A., Rao, G., Sena, A.G., et al. (2021). Characterising the background incidence rates of adverse events of special interest COVID-19 vaccines in eight countries: multinational network cohort study. *The BMJ* 2021(373):n1435. <https://doi.org/10.1101/2021.03.25.21254315>. [10]

<sup>c</sup>Kytö, V., Saraste, A., Voipio-Pulkki, L., and Saukko, P. (2007). Incidence of fatal myocarditis: a population-based study in Finland. *American Journal of Epidemiology* 165(5):570–574. <https://doi.org/10.1093/aje/kwk076>. [11]

**Table S7. Rates of myocarditis cases per million Pfizer COVID-19 vaccine doses in Australia by age and sex.**

| Age (years) | First dose |        | Second dose |        | Third dose <sup>a</sup> |        |
|-------------|------------|--------|-------------|--------|-------------------------|--------|
|             | Male       | Female | Male        | Female | Male                    | Female |
| 12-19       | 24         | 6      | 103         | 25     | 103                     | 25     |
| 20-29       | 17         | 7      | 59          | 19     | 59                      | 19     |
| 30-39       | 17         | 8      | 15          | 6      | 15                      | 6      |
| 40-49       | 5          | 5      | 11          | 9      | 11                      | 9      |
| 50-59       | 7          | 2      | 1           | 4      | 1                       | 4      |
| 60-69       | 4          | 6      | 0           | 0      | 0                       | 0      |
| ≥70         | 0          | 4      | 0           | 0      | 0                       | 0      |

<sup>a</sup>Assumed the same rates as after second dose because no data were available for rates after third dose.

Source:

Therapeutic Goods Administration. (2021). COVID-19 vaccine weekly safety report – 09-12-2021. *Australian Government Department of Health*. Accessed 17 December 2021 from <https://www.tga.gov.au/periodic/covid-19-vaccine-weekly-safety-report-09-12-2021>. [12]

**Table S8. COVID-19-related myocarditis cases, deaths, and case fatality rate in ages ≥12 years by age and sex, up to 6 months post-myocarditis diagnosis.**

| Age (years)  | Male           |                   |              |                  |               | Female         |                   |              |                  |               |
|--------------|----------------|-------------------|--------------|------------------|---------------|----------------|-------------------|--------------|------------------|---------------|
|              | COVID-19 cases | Myocarditis cases | Incidence    | Deaths           | Case fatality | COVID-19 cases | Myocarditis cases | Incidence    | Deaths           | Case fatality |
| 12-19        | 1106           | 152               | 13.74%       | 0 <sup>a</sup>   | <1.00%        | 12,291         | 204               | 1.66%        | ≤10 <sup>b</sup> | <1.00%        |
| 20-29        | 31,758         | 661               | 2.08%        | 0 <sup>a</sup>   | <1.00%        | 54,404         | 1321              | 2.43%        | ≤10 <sup>b</sup> | <1.00%        |
| 30-39        | 43,723         | 1025              | 2.34%        | ≤10 <sup>b</sup> | <1.00%        | 76,988         | 1849              | 2.40%        | ≤10 <sup>b</sup> | <1.00%        |
| 40-49        | 41,971         | 1044              | 2.49%        | 18               | 1.72%         | 65,273         | 1690              | 2.59%        | ≤10 <sup>b</sup> | <1.00%        |
| 50-59        | 51,473         | 1242              | 2.41%        | 44               | 3.54%         | 68,627         | 1644              | 2.40%        | 23               | 1.40%         |
| 60-69        | 57,880         | 1286              | 2.22%        | 95               | 7.39%         | 65,223         | 1458              | 2.24%        | 59               | 4.05%         |
| ≥70          | 66,431         | 1314              | 1.98%        | 199              | 15.14%        | 74,800         | 1452              | 1.94%        | 183              | 12.60%        |
| <b>Total</b> | <b>294,342</b> | <b>6724</b>       | <b>2.28%</b> | <b>366</b>       | <b>5.44%</b>  | <b>417,606</b> | <b>9618</b>       | <b>2.30%</b> | <b>305</b>       | <b>3.17%</b>  |

<sup>a</sup>For males aged 12-19 and 20-29 years, there were zero deaths out of 152 and 661 cases of myocarditis, respectively. To avoid using a 0% case fatality rate in the model, we assumed that 12-19 and 20-29 year old males had the same case fatality rate as 30-39 year old males (1.00%).

<sup>b</sup>Patient counts of ≤10 were rounded up to 10 to safeguard protected healthcare data. Related case fatality rates were thus assumed to be <1.00%, with a value of 1.00% used in the model to assume the worst-case scenario.

Source:

Personal communication from authors regarding patient cohort described in: Buckley, B.J.R., et al. (2021). Prevalence and clinical outcomes of myocarditis and pericarditis in 718,365 COVID-19 patients. *European Journal of Clinical Investigation* 51(11):e13669. <https://doi.org/10.1111/cei.13679>. [13]

**Table S9. Age distribution of Australian population, March 2021.**

| Age (years)  | Population        | % of total population |
|--------------|-------------------|-----------------------|
| 0-11         | 3,828,247         | 14.90%                |
| 12-19        | 2,438,423         | 9.49%                 |
| 20-29        | 3,617,689         | 14.08%                |
| 30-39        | 3,757,954         | 14.63%                |
| 40-49        | 3,296,519         | 12.83%                |
| 50-59        | 3,120,900         | 12.15%                |
| 60-69        | 2,696,731         | 10.50%                |
| ≥70          | 2,936,879         | 11.43%                |
| <b>Total</b> | <b>25,693,342</b> | <b>100.00%</b>        |

Source:

<sup>a</sup>Australian Bureau of Statistics. (2021). National, state and territory population. *Australian Bureau of Statistics*. Accessed 15 December 2021 from [https://www.abs.gov.au/statistics/people/population/national-state-and-territory-population/mar-2021/31010do002\\_202103.xls](https://www.abs.gov.au/statistics/people/population/national-state-and-territory-population/mar-2021/31010do002_202103.xls). [8]

**Table S10. Results of manual calculations used to validate the mathematical assumptions used to parameterise the model. Values provided are from two independent modellers (blue, green) and model estimates (purple).**

| Questions                                                                                                                                                                                        | Calculated estimate                                                                                                                                         |
|--------------------------------------------------------------------------------------------------------------------------------------------------------------------------------------------------|-------------------------------------------------------------------------------------------------------------------------------------------------------------|
| <b>1.</b> For a 30-39 year-old male, what is the chance of symptomatic infection under ATAGI high transmission if:                                                                               | a) Not vaccinated<br>0.022701<br>0.022656<br>0.022656                                                                                                       |
|                                                                                                                                                                                                  | b) Had one dose (administered <3 weeks ago)<br>0.010647<br>0.010626<br>0.010626                                                                             |
|                                                                                                                                                                                                  | c) Had two doses (last dose 0-<2 months ago)<br>0.003065<br>0.003059<br>0.003059                                                                            |
|                                                                                                                                                                                                  | d) Had two doses (last dose 2-<4 months ago)<br>0.006129<br>0.006117<br>0.006117                                                                            |
|                                                                                                                                                                                                  | e) Had two doses (last dose 4-<6 months ago)<br>0.011804<br>0.011781<br>0.011781                                                                            |
|                                                                                                                                                                                                  | f) Had three doses<br>0.000795<br>0.000793<br>0.000793                                                                                                      |
| <b>2.</b> For a 30-39 year-old male with symptomatic COVID-19, what is the chance of dying from COVID-19 if:                                                                                     | a) Not vaccinated<br>0.000693<br>0.000693<br>0.000693                                                                                                       |
|                                                                                                                                                                                                  | b) Had one dose (administered <3 weeks ago)<br>0.000076<br>0.000076<br>0.000076                                                                             |
|                                                                                                                                                                                                  | c) Had two doses (last dose 0-<2 months ago)<br>0.000012<br>0.000012<br>0.000012                                                                            |
|                                                                                                                                                                                                  | d) Had two doses (last dose 2-<4 months ago)<br>0.000033<br>0.000033<br>0.000033                                                                            |
|                                                                                                                                                                                                  | e) Had two doses (last dose 4-<6 months ago)<br>0.000057<br>0.000057<br>0.000057                                                                            |
|                                                                                                                                                                                                  | f) Had three doses<br>0.000012<br>0.000012<br>0.000012                                                                                                      |
| <b>* 3.</b> Under ATAGI high transmission, for one million 50-59 year-old females, if 5% have had no vaccine doses, 5% have had 1 dose only, 60% have had 2 doses only and 30% have had 3 doses: | a) How many cases of vaccine-induced myocarditis would we expect?<br>6.700000<br>6.700000<br>6.700000                                                       |
|                                                                                                                                                                                                  | b) How many vaccine-associated myocarditis-induced deaths would we expect?<br>0.022919<br>0.022919<br>0.022919                                              |
| <b>* 4.</b> For one million ≥70 year-old males, if 5% have had no vaccine doses, 5% have had 1 dose only, 60% have had 2 doses only and 30% have had 3 doses:                                    | a) How many symptomatic cases would we expect over 2 months if there was ATAGI medium transmission during this time?<br>183.0304<br>183.2208<br>183.2208    |
|                                                                                                                                                                                                  | b) How many deaths from COVID-19 would we expect over 2 months if there was ATAGI medium transmission during this time?<br>6.379250<br>6.389558<br>6.389558 |
| <b>5.</b> If a 60-69 year-old female was diagnosed with COVID-19:                                                                                                                                | a) What are her chances of developing COVID-19-related myocarditis?<br>0.022354<br>0.022354<br>0.022354                                                     |
|                                                                                                                                                                                                  | b) What are her chances of dying from COVID-19-related myocarditis (before diagnosis)?<br>0.000905<br>0.000905<br>0.000905                                  |

|                             |                                                               |                                  |
|-----------------------------|---------------------------------------------------------------|----------------------------------|
| Additional population risk: | c) What are her background chances of developing myocarditis? | 0.000036<br>0.000036<br>0.000036 |
|                             | d) What are her background chances of dying from myocarditis? | 0.000001<br>0.000001<br>0.000001 |

\*Model estimates for Questions 3 and 4 are calculated using the population level model described in section 2.1, 'Model description'.

**Table S11. Comparison of symptomatic COVID-19 cases prevented by Pfizer COVID-19 vaccine versus cases of Pfizer vaccine-associated myocarditis under different intensities of community transmission.** Assuming transmission of delta variant; 5% of unvaccinated, 5% received first dose, 60% received two doses; 30% received three doses; vaccine effectiveness against symptomatic infection as reported in Table S1; age-sex-specific myocarditis incidence as shown in Table S7.

| Age group (years)         | Community transmission intensity (probability of infection over 2 months) | Estimated COVID-19 cases over 2 months (per million <sup>a</sup> ) |                                                   | Estimated COVID-19 cases prevented over 2 months if 5% had 1st dose, 60% had 2 doses, 30% had three doses (per million <sup>a</sup> ) | Estimated cases of vaccine-associated myocarditis if 5% had 1st dose, 60% had 2 doses, 30% had 3 doses (per million <sup>a</sup> ) | Estimated cases of symptomatic COVID-19 prevented per vaccine-associated myocarditis cases |
|---------------------------|---------------------------------------------------------------------------|--------------------------------------------------------------------|---------------------------------------------------|---------------------------------------------------------------------------------------------------------------------------------------|------------------------------------------------------------------------------------------------------------------------------------|--------------------------------------------------------------------------------------------|
|                           |                                                                           | 0% vaccinated                                                      | 5% had 1st dose, 60% had 2 doses, 30% had 3 doses |                                                                                                                                       |                                                                                                                                    |                                                                                            |
| All ages ≥12 <sup>b</sup> | 1%                                                                        | 9259                                                               | 2378                                              | 6881                                                                                                                                  | 28                                                                                                                                 | 246                                                                                        |
|                           | 5%                                                                        | 46,295                                                             | 11,889                                            | 34,406                                                                                                                                |                                                                                                                                    | 1229                                                                                       |
|                           | 10%                                                                       | 92,590                                                             | 23,777                                            | 68,813                                                                                                                                |                                                                                                                                    | 2458                                                                                       |
| 12-19                     | 1%                                                                        | 13,768                                                             | 2739                                              | 11,029                                                                                                                                | 91                                                                                                                                 | 121                                                                                        |
|                           | 5%                                                                        | 68,840                                                             | 13,696                                            | 55,144                                                                                                                                |                                                                                                                                    | 606                                                                                        |
|                           | 10%                                                                       | 137,679                                                            | 27,391                                            | 110,288                                                                                                                               |                                                                                                                                    | 1212                                                                                       |
| 20-29                     | 1%                                                                        | 13,478                                                             | 3625                                              | 9853                                                                                                                                  | 58                                                                                                                                 | 170                                                                                        |
|                           | 5%                                                                        | 67,390                                                             | 18,125                                            | 49,265                                                                                                                                |                                                                                                                                    | 849                                                                                        |
|                           | 10%                                                                       | 134,780                                                            | 36,249                                            | 98,531                                                                                                                                |                                                                                                                                    | 1699                                                                                       |
| 30-39                     | 1%                                                                        | 11,536                                                             | 3103                                              | 8433                                                                                                                                  | 24                                                                                                                                 | 351                                                                                        |
|                           | 5%                                                                        | 57,679                                                             | 15,513                                            | 42,167                                                                                                                                |                                                                                                                                    | 1757                                                                                       |
|                           | 10%                                                                       | 115,259                                                            | 31,026                                            | 84,333                                                                                                                                |                                                                                                                                    | 3514                                                                                       |
| 40-49                     | 1%                                                                        | 9608                                                               | 2522                                              | 7086                                                                                                                                  | 16                                                                                                                                 | 443                                                                                        |
|                           | 5%                                                                        | 48,040                                                             | 12,608                                            | 35,432                                                                                                                                |                                                                                                                                    | 2215                                                                                       |
|                           | 10%                                                                       | 96,081                                                             | 25,216                                            | 70,864                                                                                                                                |                                                                                                                                    | 4429                                                                                       |
| 50-59                     | 1%                                                                        | 7352                                                               | 1912                                              | 5441                                                                                                                                  | 7                                                                                                                                  | 777                                                                                        |
|                           | 5%                                                                        | 36,762                                                             | 9559                                              | 27,203                                                                                                                                |                                                                                                                                    | 3886                                                                                       |
|                           | 10%                                                                       | 73,523                                                             | 19,118                                            | 54,405                                                                                                                                |                                                                                                                                    | 7772                                                                                       |
| 60-69                     | 1%                                                                        | 5045                                                               | 1475                                              | 3570                                                                                                                                  | 5                                                                                                                                  | 714                                                                                        |
|                           | 5%                                                                        | 25,224                                                             | 7373                                              | 17,851                                                                                                                                |                                                                                                                                    | 3570                                                                                       |
|                           | 10%                                                                       | 50,448                                                             | 14,746                                            | 35,702                                                                                                                                |                                                                                                                                    | 7140                                                                                       |
| ≥70                       | 1%                                                                        | 4026                                                               | 1269                                              | 2757                                                                                                                                  | 2                                                                                                                                  | 1379                                                                                       |
|                           | 5%                                                                        | 20,130                                                             | 6347                                              | 13,783                                                                                                                                |                                                                                                                                    | 6892                                                                                       |
|                           | 10%                                                                       | 40,260                                                             | 12,694                                            | 27,566                                                                                                                                |                                                                                                                                    | 13,783                                                                                     |

<sup>a</sup>Per million population of each age group, or per million of all ages based on population distribution of Australia. [8]

<sup>b</sup>Calculations for all ages based on population distribution of Australia. [8]

## References

1. Chodick, G., Tene, L., Patalon, T., Gazit, S., Tov, A.B., Cohen, D., and Muhsen, K. (2021). Assessment of effectiveness of 1 dose of BNT162b2 vaccine for SARS-CoV-2 infection 13 to 24 days after immunization. *JAMA Network Open* 4(6):e2115985. <https://doi.org/10.1001/jamanetworkopen.2021.15985>.
2. Tartof, S.Y., Slezak, J.M., Fischer, H., Hong, V., Ackerson, B.K., Ranasinghe, O.N., et al. (2021). Effectiveness of mRNA BNT162b2 COVID-19 vaccine up to 6 months in a large integrated health system in the USA: a retrospective cohort study. *The Lancet* 398(10309):1407–1416. [https://doi.org/10.1016/S0140-6736\(21\)02183-8](https://doi.org/10.1016/S0140-6736(21)02183-8).
3. Perez, J.L. (2021). Efficacy and safety of BNT162b2 booster – C4591031 2 month interim analysis. *Centers for Disease Control and Prevention*. Accessed 17 December 2021 from <https://www.cdc.gov/vaccines/acip/meetings/downloads/slides-2021-11-19/02-COVID-Perez-508.pdf>.
4. Nasreen, S., Chung, H., He, S., Brown, K.A., Gubbay, J.B., Buchan, S.A., et al. (2021). Effectiveness of mRNA and ChAdOx1 COVID-19 vaccines against symptomatic SARS-CoV-2 infection and severe outcomes with variants of concern in Ontario. *medRxiv*. <https://doi.org/10.1101/2021.06.28.21259420>.
5. Andrews, N., Tessier, E., Stowe, J., Gower, C., Kirsebom, F., Simmons, R., et al. (2021). *medRxiv*. <https://doi.org/10.1101/2021.09.15.21263583>.
6. Australian Government Department of Health. (2021). Coronavirus (COVID-19) case numbers and statistics – cases and deaths by age and sex. *Australian Government Department of Health*. Accessed 17 December 2021 from <https://www.health.gov.au/news/health-alerts/novel-coronavirus-2019-ncov-health-alert/coronavirus-covid-19-case-numbers-and-statistics#COVID19-summary-statistics>.
7. Australian Government Department of Health. (2021). Coronavirus disease 2019 (COVID-19) epidemiology reports, Australia, 2020-2021. *Australian Government Department of Health*. Accessed 17 December 2021 from [https://www1.health.gov.au/internet/main/publishing.nsf/Content/novel\\_coronavirus\\_2019\\_ncov\\_weekly\\_epidemiology\\_reports\\_australia\\_2020.htm](https://www1.health.gov.au/internet/main/publishing.nsf/Content/novel_coronavirus_2019_ncov_weekly_epidemiology_reports_australia_2020.htm).
8. Australian Bureau of Statistics. (2021). National, state and territory population. *Australian Bureau of Statistics*. Accessed 15 December 2021 from [https://www.abs.gov.au/statistics/people/population/national-state-and-territory-population/mar-2021/31010do002\\_202103.xls](https://www.abs.gov.au/statistics/people/population/national-state-and-territory-population/mar-2021/31010do002_202103.xls).
9. Australian Technical Advisory Group on Immunisation. (2021). Weighing up the potential benefits and risk of harm from COVID-19 vaccine AstraZeneca. *Australian Government Department of Health*. Accessed 17 December 2021 from [https://www.health.gov.au/sites/default/files/documents/2021/06/covid-19-vaccination-weighing-up-the-potential-benefits-against-risk-of-harm-from-covid-19-vaccine-astrazeneca\\_2.pdf](https://www.health.gov.au/sites/default/files/documents/2021/06/covid-19-vaccination-weighing-up-the-potential-benefits-against-risk-of-harm-from-covid-19-vaccine-astrazeneca_2.pdf).
10. Li, X., Ostropelets, A., Makadia, R., Shoaibi, A., Rao, G., Sena, A.G., et al. (2021). Characterising the background incidence rates of adverse events of special interest COVID-19 vaccines in eight countries: multinational network cohort study. *The BMJ* 2021(373):n1435. <https://doi.org/10.1101/2021.03.25.21254315>.
11. Kytö, V., Saraste, A., Voipio-Pulkki, L., and Saukko, P. (2007). Incidence of fatal myocarditis: a population-based study in Finland. *American Journal of Epidemiology* 165(5):570–574. <https://doi.org/10.1093/aje/kwk076>.
12. Therapeutic Goods Administration. (2021). COVID-19 vaccine weekly safety report – 09-12-2021. *Australian Government Department of Health*. Accessed 17 December 2021 from <https://www.tga.gov.au/periodic/covid-19-vaccine-weekly-safety-report-09-12-2021>.
13. Buckley, B.J.R., Harrison, S.L., Fazio-Eynullayeva, E., Underhill, P., Lane, D.A., and Lip, G.Y.H. (2021). Prevalence and clinical outcomes of myocarditis and pericarditis in 718,365 COVID-19 patients. *European Journal of Clinical Investigation* 51(11):e13669. <https://doi.org/10.1111/eci.13679>.
